# Supplementary material for: Urinary MicroRNA Profiling in the Nephropathy of Type 1 Diabetes
Source: PLoS One. 2013 Jan 24;8(1):e54662. doi: 10.1371/journal.pone.0054662 (PMC3554645; doi:10.1371/journal.pone.0054662)
Supplement: Table S1 — Names and accession numbers of microRNA species analyzed in this study. miRBase names prior to the 18th release are included as well to facilitate comparison with earlier literature. Retired entries in the 18th release of miRBase are marked as“DEAD”; in the case of microRNA species not present in a particular database a “NA” entry was included in the table. (XLS) [file pone.0054662.s003.xls]

## Sheet: AnnotMiRanda_Exiqon_TScan_MiRBa
MiRBase Accession	Pre MiRBase v 18 Name	MiRBase v 18 Name	Target Scan v 6.0 family	Target Scan v6.0 Name
DEAD	hsa-miR-1259	NA	NA	NA
DEAD	hsa-miR-220b	NA	NA	NA
DEAD	hsa-miR-220c	NA	NA	NA
DEAD	hsa-miR-1201	NA	NA	NA
DEAD	hsa-miR-886-3p	NA	NA	NA
DEAD	hsa-miR-1974	NA	NA	NA
DEAD	hsa-miR-886-5p	NA	NA	NA
DEAD	hsa-miR-220a	NA	NA	NA
DEAD	hsa-miR-1979	NA	NA	NA
MIMAT0000062	hsa-let-7a	hsa-let-7a-5p	let-7/98/4458/4500	hsa-let-7a
MIMAT0000063	hsa-let-7b	hsa-let-7b-5p	let-7/98/4458/4500	hsa-let-7b
MIMAT0000064	hsa-let-7c	hsa-let-7c	let-7/98/4458/4500	hsa-let-7c
MIMAT0000065	hsa-let-7d	hsa-let-7d-5p	let-7/98/4458/4500	hsa-let-7d
MIMAT0000066	hsa-let-7e	hsa-let-7e-5p	let-7/98/4458/4500	hsa-let-7e
MIMAT0000067	hsa-let-7f	hsa-let-7f-5p	let-7/98/4458/4500	hsa-let-7f
MIMAT0000068	hsa-miR-15a	hsa-miR-15a-5p	miR-15abc/16/16abc/195/322/424/497/1907	hsa-miR-15a
MIMAT0000069	hsa-miR-16	hsa-miR-16-5p	miR-15abc/16/16abc/195/322/424/497/1907	hsa-miR-16
MIMAT0000070	hsa-miR-17	hsa-miR-17-5p	miR-17/17-5p/20ab/20b-5p/93/106ab/427/518a-3p/519d	hsa-miR-17
MIMAT0000071	hsa-miR-17*	hsa-miR-17-3p	NA	NA
MIMAT0000072	hsa-miR-18a	hsa-miR-18a-5p	miR-18ab/4735-3p	hsa-miR-18a
MIMAT0000073	hsa-miR-19a	hsa-miR-19a-3p	miR-19ab	hsa-miR-19a
MIMAT0000074	hsa-miR-19b	hsa-miR-19b-3p	miR-19ab	hsa-miR-19b
MIMAT0000075	hsa-miR-20a	hsa-miR-20a-5p	miR-17/17-5p/20ab/20b-5p/93/106ab/427/518a-3p/519d	hsa-miR-20a
MIMAT0000076	hsa-miR-21	hsa-miR-21-5p	miR-21/590-5p	hsa-miR-21
MIMAT0000077	hsa-miR-22	hsa-miR-22-3p	miR-22/22-3p	hsa-miR-22
MIMAT0000078	hsa-miR-23a	hsa-miR-23a-3p	miR-23abc/23b-3p	hsa-miR-23a
MIMAT0000079	hsa-miR-24-1*	hsa-miR-24-1-5p	NA	NA
MIMAT0000080	hsa-miR-24	hsa-miR-24-3p	miR-24/24ab/24-3p	hsa-miR-24
MIMAT0000081	hsa-miR-25	hsa-miR-25-3p	miR-25/32/92abc/363/363-3p/367	hsa-miR-25
MIMAT0000082	hsa-miR-26a	hsa-miR-26a-5p	miR-26ab/1297/4465	hsa-miR-26a
MIMAT0000083	hsa-miR-26b	hsa-miR-26b-5p	miR-26ab/1297/4465	hsa-miR-26b
MIMAT0000084	hsa-miR-27a	hsa-miR-27a-3p	miR-27abc/27a-3p	hsa-miR-27a
MIMAT0000085	hsa-miR-28-5p	hsa-miR-28-5p	miR-28-5p/708/1407/1653/3139	hsa-miR-28-5p
MIMAT0000086	hsa-miR-29a	hsa-miR-29a-3p	miR-29abcd	hsa-miR-29a
MIMAT0000087	hsa-miR-30a	hsa-miR-30a-5p	miR-30abcdef/30abe-5p/384-5p	hsa-miR-30a
MIMAT0000088	hsa-miR-30a*	hsa-miR-30a-3p	NA	NA
MIMAT0000089	hsa-miR-31	hsa-miR-31-5p	miR-31	hsa-miR-31
MIMAT0000090	hsa-miR-32	hsa-miR-32-5p	miR-25/32/92abc/363/363-3p/367	hsa-miR-32
MIMAT0000091	hsa-miR-33a	hsa-miR-33a-5p	miR-33ab/33-5p	hsa-miR-33a
MIMAT0000092	hsa-miR-92a	hsa-miR-92a-3p	miR-25/32/92abc/363/363-3p/367	hsa-miR-92a
MIMAT0000093	hsa-miR-93	hsa-miR-93-5p	miR-17/17-5p/20ab/20b-5p/93/106ab/427/518a-3p/519d	hsa-miR-93
MIMAT0000094	hsa-miR-95	hsa-miR-95	miR-95	hsa-miR-95
MIMAT0000095	hsa-miR-96	hsa-miR-96-5p	miR-96/507/1271	hsa-miR-96
MIMAT0000096	hsa-miR-98	hsa-miR-98	let-7/98/4458/4500	hsa-miR-98
MIMAT0000097	hsa-miR-99a	hsa-miR-99a-5p	miR-99ab/100	hsa-miR-99a
MIMAT0000098	hsa-miR-100	hsa-miR-100-5p	miR-99ab/100	hsa-miR-100
MIMAT0000099	hsa-miR-101	hsa-miR-101-3p	miR-101/101ab	hsa-miR-101
MIMAT0000100	hsa-miR-29b	hsa-miR-29b-3p	miR-29abcd	hsa-miR-29b
MIMAT0000101	hsa-miR-103	hsa-miR-103a-3p	miR-103a/107/107ab	hsa-miR-103a
MIMAT0000102	hsa-miR-105	hsa-miR-105-5p	miR-105/105ab	hsa-miR-105
MIMAT0000103	hsa-miR-106a	hsa-miR-106a-5p	miR-17/17-5p/20ab/20b-5p/93/106ab/427/518a-3p/519d	hsa-miR-106a
MIMAT0000104	hsa-miR-107	hsa-miR-107	miR-103a/107/107ab	hsa-miR-107
MIMAT0000222	hsa-miR-192	hsa-miR-192-5p	miR-192/215	hsa-miR-192
MIMAT0000226	hsa-miR-196a	hsa-miR-196a-5p	miR-196abc	hsa-miR-196a
MIMAT0000227	hsa-miR-197	hsa-miR-197-3p	miR-197	hsa-miR-197
MIMAT0000228	hsa-miR-198	hsa-miR-198	miR-198	hsa-miR-198
MIMAT0000231	hsa-miR-199a-5p	hsa-miR-199a-5p	miR-199ab-5p	hsa-miR-199a-5p
MIMAT0000232	hsa-miR-199a-3p	hsa-miR-199a-3p	miR-199ab-3p/3129-5p	hsa-miR-199a-3p
MIMAT0000241	hsa-miR-208a	hsa-miR-208a	miR-208ab/208ab-3p	hsa-miR-208a
MIMAT0000242	hsa-miR-129-5p	hsa-miR-129-5p	miR-129-5p/129ab-5p	hsa-miR-129-5p
MIMAT0000243	hsa-miR-148a	hsa-miR-148a-3p	miR-148ab-3p/152	hsa-miR-148a
MIMAT0000244	hsa-miR-30c	hsa-miR-30c-5p	miR-30abcdef/30abe-5p/384-5p	hsa-miR-30c
MIMAT0000245	hsa-miR-30d	hsa-miR-30d-5p	miR-30abcdef/30abe-5p/384-5p	hsa-miR-30d
MIMAT0000250	hsa-miR-139-5p	hsa-miR-139-5p	miR-139-5p	hsa-miR-139-5p
MIMAT0000251	hsa-miR-147	hsa-miR-147a	miR-147/147a/2423/2470	hsa-miR-147
MIMAT0000252	hsa-miR-7	hsa-miR-7-5p	miR-7/7ab	hsa-miR-7
MIMAT0000253	hsa-miR-10a	hsa-miR-10a-5p	miR-10abc/10a-5p	hsa-miR-10a
MIMAT0000254	hsa-miR-10b	hsa-miR-10b-5p	miR-10abc/10a-5p	hsa-miR-10b
MIMAT0000255	hsa-miR-34a	hsa-miR-34a-5p	miR-34ac/34bc-5p/449abc/449c-5p	hsa-miR-34a
MIMAT0000256	hsa-miR-181a	hsa-miR-181a-5p	miR-181abcd/4262	hsa-miR-181a
MIMAT0000257	hsa-miR-181b	hsa-miR-181b-5p	miR-181abcd/4262	hsa-miR-181b
MIMAT0000258	hsa-miR-181c	hsa-miR-181c-5p	miR-181abcd/4262	hsa-miR-181c
MIMAT0000259	hsa-miR-182	hsa-miR-182-5p	miR-182	hsa-miR-182
MIMAT0000260	hsa-miR-182*	hsa-miR-182-3p	NA	NA
MIMAT0000261	hsa-miR-183	hsa-miR-183-5p	miR-183	hsa-miR-183
MIMAT0000262	hsa-miR-187	hsa-miR-187-3p	miR-187	hsa-miR-187
MIMAT0000263	hsa-miR-199b-5p	hsa-miR-199b-5p	miR-199ab-5p	hsa-miR-199b-5p
MIMAT0000264	hsa-miR-203	hsa-miR-203	miR-203	hsa-miR-203
MIMAT0000265	hsa-miR-204	hsa-miR-204-5p	miR-204/204b/211	hsa-miR-204
MIMAT0000266	hsa-miR-205	hsa-miR-205-5p	miR-205/205ab	hsa-miR-205
MIMAT0000267	hsa-miR-210	hsa-miR-210	miR-210	hsa-miR-210
MIMAT0000268	hsa-miR-211	hsa-miR-211-5p	miR-204/204b/211	hsa-miR-211
MIMAT0000269	hsa-miR-212	hsa-miR-212-3p	miR-132/212/212-3p	hsa-miR-212
MIMAT0000270	hsa-miR-181a*	hsa-miR-181a-3p	NA	NA
MIMAT0000271	hsa-miR-214	hsa-miR-214-3p	miR-214/761/3619-5p	hsa-miR-214
MIMAT0000272	hsa-miR-215	hsa-miR-215	miR-192/215	hsa-miR-215
MIMAT0000273	hsa-miR-216a	hsa-miR-216a	miR-216a	hsa-miR-216a
MIMAT0000274	hsa-miR-217	hsa-miR-217	miR-217	hsa-miR-217
MIMAT0000275	hsa-miR-218	hsa-miR-218-5p	miR-218/218a	hsa-miR-218
MIMAT0000276	hsa-miR-219-5p	hsa-miR-219-5p	miR-219-5p/508/508-3p/4782-3p	hsa-miR-219-5p
MIMAT0000278	hsa-miR-221	hsa-miR-221-3p	miR-221/222/222ab/1928	hsa-miR-221
MIMAT0000279	hsa-miR-222	hsa-miR-222-3p	miR-221/222/222ab/1928	hsa-miR-222
MIMAT0000280	hsa-miR-223	hsa-miR-223-3p	miR-223	hsa-miR-223
MIMAT0000281	hsa-miR-224	hsa-miR-224-5p	miR-224	hsa-miR-224
MIMAT0000318	hsa-miR-200b	hsa-miR-200b-3p	miR-200bc/429/548a	hsa-miR-200b
MIMAT0000414	hsa-let-7g	hsa-let-7g-5p	let-7/98/4458/4500	hsa-let-7g
MIMAT0000415	hsa-let-7i	hsa-let-7i-5p	let-7/98/4458/4500	hsa-let-7i
MIMAT0000416	hsa-miR-1	hsa-miR-1	miR-1ab/206/613	hsa-miR-1
MIMAT0000417	hsa-miR-15b	hsa-miR-15b-5p	miR-15abc/16/16abc/195/322/424/497/1907	hsa-miR-15b
MIMAT0000418	hsa-miR-23b	hsa-miR-23b-3p	miR-23abc/23b-3p	hsa-miR-23b
MIMAT0000419	hsa-miR-27b	hsa-miR-27b-3p	miR-27abc/27a-3p	hsa-miR-27b
MIMAT0000420	hsa-miR-30b	hsa-miR-30b-5p	miR-30abcdef/30abe-5p/384-5p	hsa-miR-30b
MIMAT0000421	hsa-miR-122	hsa-miR-122-5p	miR-122/122a/1352	hsa-miR-122
MIMAT0000422	hsa-miR-124	hsa-miR-124-3p	miR-124/124ab/506	hsa-miR-124
MIMAT0000423	hsa-miR-125b	hsa-miR-125b-5p	miR-125a-5p/125b-5p/351/670/4319	hsa-miR-125b
MIMAT0000424	hsa-miR-128	hsa-miR-128	miR-128/128ab	hsa-miR-128
MIMAT0000425	hsa-miR-130a	hsa-miR-130a-3p	miR-130ac/301ab/301b/301b-3p/454/721/4295/3666	hsa-miR-130a
MIMAT0000426	hsa-miR-132	hsa-miR-132-3p	miR-132/212/212-3p	hsa-miR-132
MIMAT0000427	hsa-miR-133a	hsa-miR-133a	miR-133abc	hsa-miR-133a
MIMAT0000428	hsa-miR-135a	hsa-miR-135a-5p	miR-135ab/135a-5p	hsa-miR-135a
MIMAT0000429	hsa-miR-137	hsa-miR-137	miR-137/137ab	hsa-miR-137
MIMAT0000430	hsa-miR-138	hsa-miR-138-5p	miR-138/138ab	hsa-miR-138
MIMAT0000431	hsa-miR-140-5p	hsa-miR-140-5p	miR-140/140-5p/876-3p/1244	hsa-miR-140-5p
MIMAT0000432	hsa-miR-141	hsa-miR-141-3p	miR-141/200a	hsa-miR-141
MIMAT0000433	hsa-miR-142-5p	hsa-miR-142-5p	miR-142-5p	hsa-miR-142-5p
MIMAT0000434	hsa-miR-142-3p	hsa-miR-142-3p	miR-142-3p	hsa-miR-142-3p
MIMAT0000435	hsa-miR-143	hsa-miR-143-3p	miR-143/1721/4770	hsa-miR-143
MIMAT0000436	hsa-miR-144	hsa-miR-144-3p	miR-144	hsa-miR-144
MIMAT0000437	hsa-miR-145	hsa-miR-145-5p	miR-145	hsa-miR-145
MIMAT0000438	hsa-miR-152	hsa-miR-152	miR-148ab-3p/152	hsa-miR-152
MIMAT0000439	hsa-miR-153	hsa-miR-153	miR-153	hsa-miR-153
MIMAT0000440	hsa-miR-191	hsa-miR-191-5p	miR-191	hsa-miR-191
MIMAT0000441	hsa-miR-9	hsa-miR-9-5p	miR-9/9ab	hsa-miR-9
MIMAT0000442	hsa-miR-9*	hsa-miR-9-3p	NA	NA
MIMAT0000443	hsa-miR-125a-5p	hsa-miR-125a-5p	miR-125a-5p/125b-5p/351/670/4319	hsa-miR-125a-5p
MIMAT0000444	hsa-miR-126*	hsa-miR-126-5p	NA	NA
MIMAT0000445	hsa-miR-126	hsa-miR-126-3p	miR-126-3p	hsa-miR-126
MIMAT0000446	hsa-miR-127-3p	hsa-miR-127-3p	miR-127/127-3p	hsa-miR-127-3p
MIMAT0000447	hsa-miR-134	hsa-miR-134	miR-134/3118	hsa-miR-134
MIMAT0000448	hsa-miR-136	hsa-miR-136-5p	miR-136	hsa-miR-136
MIMAT0000449	hsa-miR-146a	hsa-miR-146a-5p	miR-146ac/146b-5p	hsa-miR-146a
MIMAT0000450	hsa-miR-149	hsa-miR-149-5p	miR-149	hsa-miR-149
MIMAT0000451	hsa-miR-150	hsa-miR-150-5p	miR-150/5127	hsa-miR-150
MIMAT0000452	hsa-miR-154	hsa-miR-154-5p	miR-154/872	hsa-miR-154
MIMAT0000453	hsa-miR-154*	hsa-miR-154-3p	NA	NA
MIMAT0000454	hsa-miR-184	hsa-miR-184	miR-184	hsa-miR-184
MIMAT0000455	hsa-miR-185	hsa-miR-185-5p	miR-185/882/3473/4306/4644	hsa-miR-185
MIMAT0000456	hsa-miR-186	hsa-miR-186-5p	miR-186	hsa-miR-186
MIMAT0000457	hsa-miR-188-5p	hsa-miR-188-5p	miR-188-5p	hsa-miR-188-5p
MIMAT0000458	hsa-miR-190	hsa-miR-190a	miR-190/190ab	hsa-miR-190
MIMAT0000459	hsa-miR-193a-3p	hsa-miR-193a-3p	miR-193/193b/193a-3p	hsa-miR-193a-3p
MIMAT0000460	hsa-miR-194	hsa-miR-194-5p	miR-194	hsa-miR-194
MIMAT0000461	hsa-miR-195	hsa-miR-195-5p	miR-15abc/16/16abc/195/322/424/497/1907	hsa-miR-195
MIMAT0000462	hsa-miR-206	hsa-miR-206	miR-1ab/206/613	hsa-miR-206
MIMAT0000510	hsa-miR-320a	hsa-miR-320a	miR-320abcd/4429	hsa-miR-320a
MIMAT0000617	hsa-miR-200c	hsa-miR-200c-3p	miR-200bc/429/548a	hsa-miR-200c
MIMAT0000646	hsa-miR-155	hsa-miR-155-5p	miR-155	hsa-miR-155
MIMAT0000680	hsa-miR-106b	hsa-miR-106b-5p	miR-17/17-5p/20ab/20b-5p/93/106ab/427/518a-3p/519d	hsa-miR-106b
MIMAT0000681	hsa-miR-29c	hsa-miR-29c-3p	miR-29abcd	hsa-miR-29c
MIMAT0000682	hsa-miR-200a	hsa-miR-200a-3p	miR-141/200a	hsa-miR-200a
MIMAT0000683	hsa-miR-302a*	hsa-miR-302a-5p	NA	NA
MIMAT0000684	hsa-miR-302a	hsa-miR-302a-3p	miR-93/93a/105/106a/291a-3p/294/295/302abcde/372/373/428/519a/520be/520acd-3p/1378/1420ac	hsa-miR-302a
MIMAT0000685	hsa-miR-34b*	hsa-miR-34b-5p	NA	NA
MIMAT0000686	hsa-miR-34c-5p	hsa-miR-34c-5p	miR-34ac/34bc-5p/449abc/449c-5p	hsa-miR-34c-5p
MIMAT0000687	hsa-miR-299-3p	hsa-miR-299-3p	miR-299/299-3p/3563-3p	hsa-miR-299-3p
MIMAT0000688	hsa-miR-301a	hsa-miR-301a-3p	miR-130ac/301ab/301b/301b-3p/454/721/4295/3666	hsa-miR-301a
MIMAT0000689	hsa-miR-99b	hsa-miR-99b-5p	miR-99ab/100	hsa-miR-99b
MIMAT0000690	hsa-miR-296-5p	hsa-miR-296-5p	miR-296-5p	hsa-miR-296-5p
MIMAT0000691	hsa-miR-130b	hsa-miR-130b-3p	miR-130ac/301ab/301b/301b-3p/454/721/4295/3666	hsa-miR-130b
MIMAT0000692	hsa-miR-30e	hsa-miR-30e-5p	miR-30abcdef/30abe-5p/384-5p	hsa-miR-30e
MIMAT0000693	hsa-miR-30e*	hsa-miR-30e-3p	NA	NA
MIMAT0000703	hsa-miR-361-5p	hsa-miR-361-5p	miR-361-5p	hsa-miR-361-5p
MIMAT0000705	hsa-miR-362-5p	hsa-miR-362-5p	miR-362-5p/500b	hsa-miR-362-5p
MIMAT0000707	hsa-miR-363	hsa-miR-363-3p	miR-25/32/92abc/363/363-3p/367	hsa-miR-363
MIMAT0000710	hsa-miR-365	hsa-miR-365a-3p	miR-33a-3p/365/365-3p	hsa-miR-365
MIMAT0000715	hsa-miR-302b	hsa-miR-302b-3p	miR-93/93a/105/106a/291a-3p/294/295/302abcde/372/373/428/519a/520be/520acd-3p/1378/1420ac	hsa-miR-302b
MIMAT0000716	hsa-miR-302c*	hsa-miR-302c-5p	NA	NA
MIMAT0000717	hsa-miR-302c	hsa-miR-302c-3p	miR-93/93a/105/106a/291a-3p/294/295/302abcde/372/373/428/519a/520be/520acd-3p/1378/1420ac	hsa-miR-302c
MIMAT0000718	hsa-miR-302d	hsa-miR-302d-3p	miR-93/93a/105/106a/291a-3p/294/295/302abcde/372/373/428/519a/520be/520acd-3p/1378/1420ac	hsa-miR-302d
MIMAT0000719	hsa-miR-367	hsa-miR-367-3p	miR-25/32/92abc/363/363-3p/367	hsa-miR-367
MIMAT0000720	hsa-miR-376c	hsa-miR-376c	miR-376c/741-5p	hsa-miR-376c
MIMAT0000722	hsa-miR-370	hsa-miR-370	miR-370	hsa-miR-370
MIMAT0000723	hsa-miR-371-3p	hsa-miR-371a-3p	miR-292-3p/371-3p	hsa-miR-371-3p
MIMAT0000724	hsa-miR-372	hsa-miR-372	miR-93/93a/105/106a/291a-3p/294/295/302abcde/372/373/428/519a/520be/520acd-3p/1378/1420ac	hsa-miR-372
MIMAT0000725	hsa-miR-373*	hsa-miR-373-5p	NA	NA
MIMAT0000726	hsa-miR-373	hsa-miR-373-3p	miR-93/93a/105/106a/291a-3p/294/295/302abcde/372/373/428/519a/520be/520acd-3p/1378/1420ac	hsa-miR-373
MIMAT0000727	hsa-miR-374a	hsa-miR-374a-5p	miR-374ab	hsa-miR-374a
MIMAT0000728	hsa-miR-375	hsa-miR-375	miR-375	hsa-miR-375
MIMAT0000729	hsa-miR-376a	hsa-miR-376a-3p	miR-376abd/376b-3p	hsa-miR-376a
MIMAT0000730	hsa-miR-377	hsa-miR-377-3p	miR-377	hsa-miR-377
MIMAT0000731	hsa-miR-378*	hsa-miR-378a-5p	NA	NA
MIMAT0000732	hsa-miR-378	hsa-miR-378a-3p	miR-378/422a/378bcdefhi	hsa-miR-378
MIMAT0000733	hsa-miR-379	hsa-miR-379-5p	miR-379/1193-5p/3529	hsa-miR-379
MIMAT0000734	hsa-miR-380*	hsa-miR-380-5p	NA	NA
MIMAT0000735	hsa-miR-380	hsa-miR-380-3p	miR-380/380-3p	hsa-miR-380
MIMAT0000736	hsa-miR-381	hsa-miR-381	miR-300/381/539-3p	hsa-miR-381
MIMAT0000737	hsa-miR-382	hsa-miR-382-5p	miR-382	hsa-miR-382
MIMAT0000738	hsa-miR-383	hsa-miR-383	miR-383	hsa-miR-383
MIMAT0000750	hsa-miR-340*	hsa-miR-340-3p	NA	NA
MIMAT0000751	hsa-miR-330-3p	hsa-miR-330-3p	miR-330-3p	hsa-miR-330-3p
MIMAT0000752	hsa-miR-328	hsa-miR-328	miR-328a/328b-3p	hsa-miR-328
MIMAT0000753	hsa-miR-342-3p	hsa-miR-342-3p	miR-342-3p	hsa-miR-342-3p
MIMAT0000754	hsa-miR-337-3p	hsa-miR-337-3p	miR-337-3p	hsa-miR-337-3p
MIMAT0000755	hsa-miR-323-3p	hsa-miR-323a-3p	miR-323/323-3p	hsa-miR-323-3p
MIMAT0000756	hsa-miR-326	hsa-miR-326	miR-326/330/330-5p	hsa-miR-326
MIMAT0000757	hsa-miR-151-3p	hsa-miR-151a-3p	miR-151-3p	hsa-miR-151-3p
MIMAT0000758	hsa-miR-135b	hsa-miR-135b-5p	miR-135ab/135a-5p	hsa-miR-135b
MIMAT0000759	hsa-miR-148b	hsa-miR-148b-3p	miR-148ab-3p/152	hsa-miR-148b
MIMAT0000760	hsa-miR-331-3p	hsa-miR-331-3p	miR-331/331-3p	hsa-miR-331-3p
MIMAT0000761	hsa-miR-324-5p	hsa-miR-324-5p	miR-324-5p	hsa-miR-324-5p
MIMAT0000762	hsa-miR-324-3p	hsa-miR-324-3p	miR-324-3p/1913	hsa-miR-324-3p
MIMAT0000763	hsa-miR-338-3p	hsa-miR-338-3p	miR-338/338-3p	hsa-miR-338-3p
MIMAT0000764	hsa-miR-339-5p	hsa-miR-339-5p	miR-339b/339-5p/3586-5p	hsa-miR-339-5p
MIMAT0000765	hsa-miR-335	hsa-miR-335-5p	miR-335/335-5p	hsa-miR-335
MIMAT0000770	hsa-miR-133b	hsa-miR-133b	miR-133abc	hsa-miR-133b
MIMAT0000771	hsa-miR-325	hsa-miR-325	miR-325-5p/1714	hsa-miR-325
MIMAT0000772	hsa-miR-345	hsa-miR-345-5p	miR-345/345-5p	hsa-miR-345
MIMAT0000773	hsa-miR-346	hsa-miR-346	miR-346	hsa-miR-346
MIMAT0001075	hsa-miR-384	hsa-miR-384	miR-384/384-3p	hsa-miR-384
MIMAT0001080	hsa-miR-196b	hsa-miR-196b-5p	miR-196abc	hsa-miR-196b
MIMAT0001339	hsa-miR-422a	hsa-miR-422a	miR-378/422a/378bcdefhi	hsa-miR-422a
MIMAT0001340	hsa-miR-423-3p	hsa-miR-423-3p	miR-423-3p	hsa-miR-423-3p
MIMAT0001341	hsa-miR-424	hsa-miR-424-5p	miR-15abc/16/16abc/195/322/424/497/1907	hsa-miR-424
MIMAT0001343	hsa-miR-425*	hsa-miR-425-3p	NA	NA
MIMAT0001412	hsa-miR-18b	hsa-miR-18b-5p	miR-18ab/4735-3p	hsa-miR-18b
MIMAT0001413	hsa-miR-20b	hsa-miR-20b-5p	miR-17/17-5p/20ab/20b-5p/93/106ab/427/518a-3p/519d	hsa-miR-20b
MIMAT0001532	hsa-miR-448	hsa-miR-448	miR-448/448-3p	hsa-miR-448
MIMAT0001536	hsa-miR-429	hsa-miR-429	miR-200bc/429/548a	hsa-miR-429
MIMAT0001541	hsa-miR-449a	hsa-miR-449a	miR-34ac/34bc-5p/449abc/449c-5p	hsa-miR-449a
MIMAT0001545	hsa-miR-450a	hsa-miR-450a-5p	miR-450a/451a	hsa-miR-450a
MIMAT0001618	hsa-miR-191*	hsa-miR-191-3p	NA	NA
MIMAT0001620	hsa-miR-200a*	hsa-miR-200a-5p	NA	NA
MIMAT0001621	hsa-miR-369-5p	hsa-miR-369-5p	miR-369-5p	hsa-miR-369-5p
MIMAT0001625	hsa-miR-431	hsa-miR-431-5p	miR-431	hsa-miR-431
MIMAT0001627	hsa-miR-433	hsa-miR-433	miR-433	hsa-miR-433
MIMAT0001629	hsa-miR-329	hsa-miR-329	miR-329/329ab/362-3p	hsa-miR-329
MIMAT0001630	hsa-miR-453	hsa-miR-323b-5p	miR-453/323b-5p	hsa-miR-323b-5p
MIMAT0001631	hsa-miR-451	hsa-miR-451a	miR-451	hsa-miR-451
MIMAT0001635	hsa-miR-452	hsa-miR-452-5p	miR-452/4676-3p	hsa-miR-452
MIMAT0001636	hsa-miR-452*	hsa-miR-452-3p	NA	NA
MIMAT0001638	hsa-miR-409-5p	hsa-miR-409-5p	miR-409-5p/409a	hsa-miR-409-5p
MIMAT0001639	hsa-miR-409-3p	hsa-miR-409-3p	miR-409-3p	hsa-miR-409-3p
MIMAT0002170	hsa-miR-412	hsa-miR-412	miR-412/3551-5p	hsa-miR-412
MIMAT0002171	hsa-miR-410	hsa-miR-410	miR-410/344de/344b-1-3p	hsa-miR-410
MIMAT0002172	hsa-miR-376b	hsa-miR-376b	miR-376abd/376b-3p	hsa-miR-376b
MIMAT0002173	hsa-miR-483-3p	hsa-miR-483-3p	miR-483-3p	hsa-miR-483-3p
MIMAT0002174	hsa-miR-484	hsa-miR-484	miR-344a-5p/484/3155/3155b	hsa-miR-484
MIMAT0002176	hsa-miR-485-3p	hsa-miR-485-3p	miR-485-3p	hsa-miR-485-3p
MIMAT0002177	hsa-miR-486-5p	hsa-miR-486-5p	miR-486-5p/3107	hsa-miR-486-5p
MIMAT0002178	hsa-miR-487a	hsa-miR-487a	miR-487a	hsa-miR-487a
MIMAT0002804	hsa-miR-488*	hsa-miR-488-5p	NA	NA
MIMAT0002805	hsa-miR-489	hsa-miR-489	miR-489/1662	hsa-miR-489
MIMAT0002806	hsa-miR-490-3p	hsa-miR-490-3p	miR-490-3p	hsa-miR-490-3p
MIMAT0002807	hsa-miR-491-5p	hsa-miR-491-5p	miR-491-5p	hsa-miR-491-5p
MIMAT0002808	hsa-miR-511	hsa-miR-511	miR-511	hsa-miR-511
MIMAT0002809	hsa-miR-146b-5p	hsa-miR-146b-5p	miR-146ac/146b-5p	hsa-miR-146b-5p
MIMAT0002810	hsa-miR-202*	hsa-miR-202-5p	NA	NA
MIMAT0002811	hsa-miR-202	hsa-miR-202-3p	miR-202-3p	hsa-miR-202
MIMAT0002812	hsa-miR-492	hsa-miR-492	miR-492	hsa-miR-492
MIMAT0002813	hsa-miR-493*	hsa-miR-493-5p	NA	NA
MIMAT0002814	hsa-miR-432	hsa-miR-432-5p	miR-432	hsa-miR-432
MIMAT0002815	hsa-miR-432*	hsa-miR-432-3p	NA	NA
MIMAT0002816	hsa-miR-494	hsa-miR-494	miR-494	hsa-miR-494
MIMAT0002817	hsa-miR-495	hsa-miR-495	miR-495/1192	hsa-miR-495
MIMAT0002818	hsa-miR-496	hsa-miR-496	miR-496	hsa-miR-496
MIMAT0002819	hsa-miR-193b	hsa-miR-193b-3p	miR-193/193b/193a-3p	hsa-miR-193b
MIMAT0002820	hsa-miR-497	hsa-miR-497-5p	miR-15abc/16/16abc/195/322/424/497/1907	hsa-miR-497
MIMAT0002821	hsa-miR-181d	hsa-miR-181d	miR-181abcd/4262	hsa-miR-181d
MIMAT0002822	hsa-miR-512-5p	hsa-miR-512-5p	miR-512-5p	hsa-miR-512-5p
MIMAT0002823	hsa-miR-512-3p	hsa-miR-512-3p	miR-93b/512-3p/1186	hsa-miR-512-3p
MIMAT0002824	hsa-miR-498	hsa-miR-498	miR-498	hsa-miR-498
MIMAT0002825	hsa-miR-520e	hsa-miR-520e	miR-93/93a/105/106a/291a-3p/294/295/302abcde/372/373/428/519a/520be/520acd-3p/1378/1420ac	hsa-miR-520e
MIMAT0002826	hsa-miR-515-5p	hsa-miR-515-5p	miR-515-5p	hsa-miR-515-5p
MIMAT0002827	hsa-miR-515-3p	hsa-miR-515-3p	miR-515-3p/519e	hsa-miR-515-3p
MIMAT0002828	hsa-miR-519e*	hsa-miR-519e-5p	NA	NA
MIMAT0002829	hsa-miR-519e	hsa-miR-519e-3p	miR-515-3p/519e	hsa-miR-519e
MIMAT0002830	hsa-miR-520f	hsa-miR-520f	miR-302ac/520f	hsa-miR-520f
MIMAT0002832	hsa-miR-519c-3p	hsa-miR-519c-3p	miR-519a/519bc-3p/291b-3p/1347	hsa-miR-519c-3p
MIMAT0002833	hsa-miR-520a-5p	hsa-miR-520a-5p	miR-520a-5p/525-5p/2464-3p	hsa-miR-520a-5p
MIMAT0002834	hsa-miR-520a-3p	hsa-miR-520a-3p	miR-93/93a/105/106a/291a-3p/294/295/302abcde/372/373/428/519a/520be/520acd-3p/1378/1420ac	hsa-miR-520a-3p
MIMAT0002835	hsa-miR-526b	hsa-miR-526b-5p	miR-526b	hsa-miR-526b
MIMAT0002836	hsa-miR-526b*	hsa-miR-526b-3p	NA	NA
MIMAT0002837	hsa-miR-519b-3p	hsa-miR-519b-3p	miR-519a/519bc-3p/291b-3p/1347	hsa-miR-519b-3p
MIMAT0002838	hsa-miR-525-5p	hsa-miR-525-5p	miR-520a-5p/525-5p/2464-3p	hsa-miR-525-5p
MIMAT0002839	hsa-miR-525-3p	hsa-miR-525-3p	miR-524-3p/525-3p	hsa-miR-525-3p
MIMAT0002840	hsa-miR-523	hsa-miR-523-3p	miR-523	hsa-miR-523
MIMAT0002841	hsa-miR-518f*	hsa-miR-518f-5p	NA	NA
MIMAT0002842	hsa-miR-518f	hsa-miR-518f-3p	miR-518bcf/518a-3p/518d-3p	hsa-miR-518f
MIMAT0002843	hsa-miR-520b	hsa-miR-520b	miR-93/93a/105/106a/291a-3p/294/295/302abcde/372/373/428/519a/520be/520acd-3p/1378/1420ac	hsa-miR-520b
MIMAT0002844	hsa-miR-518b	hsa-miR-518b	miR-518bcf/518a-3p/518d-3p	hsa-miR-518b
MIMAT0002846	hsa-miR-520c-3p	hsa-miR-520c-3p	miR-93/93a/105/106a/291a-3p/294/295/302abcde/372/373/428/519a/520be/520acd-3p/1378/1420ac	hsa-miR-520c-3p
MIMAT0002847	hsa-miR-518c*	hsa-miR-518c-5p	NA	NA
MIMAT0002848	hsa-miR-518c	hsa-miR-518c-3p	miR-518bcf/518a-3p/518d-3p	hsa-miR-518c
MIMAT0002849	hsa-miR-524-5p	hsa-miR-524-5p	miR-518a-5p/520d-5p/524-5p	hsa-miR-524-5p
MIMAT0002850	hsa-miR-524-3p	hsa-miR-524-3p	miR-524-3p/525-3p	hsa-miR-524-3p
MIMAT0002851	hsa-miR-517*	hsa-miR-517-5p	NA	NA
MIMAT0002852	hsa-miR-517a	hsa-miR-517a-3p	miR-517ac	hsa-miR-517a
MIMAT0002853	hsa-miR-519d	hsa-miR-519d	miR-17/17-5p/20ab/20b-5p/93/106ab/427/518a-3p/519d	hsa-miR-519d
MIMAT0002854	hsa-miR-521	hsa-miR-521	miR-521	hsa-miR-521
MIMAT0002855	hsa-miR-520d-5p	hsa-miR-520d-5p	miR-518a-5p/520d-5p/524-5p	hsa-miR-520d-5p
MIMAT0002856	hsa-miR-520d-3p	hsa-miR-520d-3p	miR-93/93a/105/106a/291a-3p/294/295/302abcde/372/373/428/519a/520be/520acd-3p/1378/1420ac	hsa-miR-520d-3p
MIMAT0002857	hsa-miR-517b	hsa-miR-517b-3p	miR-517b	hsa-miR-517b
MIMAT0002858	hsa-miR-520g	hsa-miR-520g	miR-520gh	hsa-miR-520g
MIMAT0002859	hsa-miR-516b	hsa-miR-516b-5p	miR-516b	hsa-miR-516b
MIMAT0002861	hsa-miR-518e	hsa-miR-518e-3p	miR-518ef	hsa-miR-518e
MIMAT0002863	hsa-miR-518a-3p	hsa-miR-518a-3p	miR-518bcf/518a-3p/518d-3p	hsa-miR-518a-3p
MIMAT0002864	hsa-miR-518d-3p	hsa-miR-518d-3p	miR-518bcf/518a-3p/518d-3p	hsa-miR-518d-3p
MIMAT0002866	hsa-miR-517c	hsa-miR-517c-3p	miR-517ac	hsa-miR-517c
MIMAT0002867	hsa-miR-520h	hsa-miR-520h	miR-520gh	hsa-miR-520h
MIMAT0002868	hsa-miR-522	hsa-miR-522-3p	miR-522/518e/1422p	hsa-miR-522
MIMAT0002869	hsa-miR-519a	hsa-miR-519a-3p	miR-519a/519bc-3p/291b-3p/1347	hsa-miR-519a
MIMAT0002870	hsa-miR-499-5p	hsa-miR-499a-5p	miR-499-5p	hsa-miR-499-5p
MIMAT0002872	hsa-miR-501-5p	hsa-miR-501-5p	miR-501-5p	hsa-miR-501-5p
MIMAT0002873	hsa-miR-502-5p	hsa-miR-502-5p	miR-502-5p	hsa-miR-502-5p
MIMAT0002874	hsa-miR-503	hsa-miR-503	miR-503	hsa-miR-503
MIMAT0002875	hsa-miR-504	hsa-miR-504	miR-504/4725-5p	hsa-miR-504
MIMAT0002876	hsa-miR-505	hsa-miR-505-3p	miR-505/505-3p	hsa-miR-505
MIMAT0002877	hsa-miR-513a-5p	hsa-miR-513a-5p	miR-513a-5p	hsa-miR-513a-5p
MIMAT0002878	hsa-miR-506	hsa-miR-506-3p	miR-124/124ab/506	hsa-miR-506
MIMAT0002880	hsa-miR-508-3p	hsa-miR-508-3p	miR-508-3p	hsa-miR-508-3p
MIMAT0002881	hsa-miR-509-3p	hsa-miR-509-3p	miR-509ab/509-3p	hsa-miR-509-3p
MIMAT0002882	hsa-miR-510	hsa-miR-510	miR-510	hsa-miR-510
MIMAT0002883	hsa-miR-514	hsa-miR-514a-3p	miR-514/514b-3p	hsa-miR-514
MIMAT0002888	hsa-miR-532-5p	hsa-miR-532-5p	miR-532-5p/511	hsa-miR-532-5p
MIMAT0002890	hsa-miR-299-5p	hsa-miR-299-5p	miR-299-5p/3563-5p	hsa-miR-299-5p
MIMAT0002891	hsa-miR-18a*	hsa-miR-18a-3p	NA	NA
MIMAT0003150	hsa-miR-455-5p	hsa-miR-455-5p	miR-455-5p	hsa-miR-455-5p
MIMAT0003161	hsa-miR-493	hsa-miR-493-3p	miR-493/493b	hsa-miR-493
MIMAT0003163	hsa-miR-539	hsa-miR-539-5p	miR-539/539-5p	hsa-miR-539
MIMAT0003164	hsa-miR-544	hsa-miR-544a	miR-544/544ab/544-3p	hsa-miR-544
MIMAT0003165	hsa-miR-545	hsa-miR-545-3p	miR-545	hsa-miR-545
MIMAT0003180	hsa-miR-487b	hsa-miR-487b	miR-487b	hsa-miR-487b
MIMAT0003214	hsa-miR-551a	hsa-miR-551a	miR-551a	hsa-miR-551a
MIMAT0003215	hsa-miR-552	hsa-miR-552	miR-552/3097-5p	hsa-miR-552
MIMAT0003216	hsa-miR-553	hsa-miR-553	miR-553	hsa-miR-553
MIMAT0003217	hsa-miR-554	hsa-miR-554	miR-554	hsa-miR-554
MIMAT0003218	hsa-miR-92b	hsa-miR-92b-3p	miR-25/32/92abc/363/363-3p/367	hsa-miR-92b
MIMAT0003219	hsa-miR-555	hsa-miR-555	miR-555	hsa-miR-555
MIMAT0003220	hsa-miR-556-5p	hsa-miR-556-5p	miR-556-5p	hsa-miR-556-5p
MIMAT0003221	hsa-miR-557	hsa-miR-557	miR-507/557	hsa-miR-557
MIMAT0003222	hsa-miR-558	hsa-miR-558	miR-558	hsa-miR-558
MIMAT0003225	hsa-miR-561	hsa-miR-561-3p	miR-561	hsa-miR-561
MIMAT0003226	hsa-miR-562	hsa-miR-562	miR-562	hsa-miR-562
MIMAT0003228	hsa-miR-564	hsa-miR-564	miR-564	hsa-miR-564
MIMAT0003230	hsa-miR-566	hsa-miR-566	miR-566	hsa-miR-566
MIMAT0003231	hsa-miR-567	hsa-miR-567	miR-567	hsa-miR-567
MIMAT0003233	hsa-miR-551b	hsa-miR-551b-3p	miR-551a	hsa-miR-551b
MIMAT0003235	hsa-miR-570	hsa-miR-570-3p	miR-570	hsa-miR-570
MIMAT0003236	hsa-miR-571	hsa-miR-571	miR-571	hsa-miR-571
MIMAT0003237	hsa-miR-572	hsa-miR-572	miR-572	hsa-miR-572
MIMAT0003238	hsa-miR-573	hsa-miR-573	miR-573/3533/3616-5p/3647-5p	hsa-miR-573
MIMAT0003239	hsa-miR-574-3p	hsa-miR-574-3p	miR-574-3p	hsa-miR-574-3p
MIMAT0003241	hsa-miR-576-5p	hsa-miR-576-5p	miR-576-5p	hsa-miR-576-5p
MIMAT0003242	hsa-miR-577	hsa-miR-577	miR-577	hsa-miR-577
MIMAT0003243	hsa-miR-578	hsa-miR-578	miR-578	hsa-miR-578
MIMAT0003244	hsa-miR-579	hsa-miR-579	miR-579	hsa-miR-579
MIMAT0003245	hsa-miR-580	hsa-miR-580	miR-580	hsa-miR-580
MIMAT0003247	hsa-miR-582-5p	hsa-miR-582-5p	miR-582-5p	hsa-miR-582-5p
MIMAT0003248	hsa-miR-583	hsa-miR-583	miR-583	hsa-miR-583
MIMAT0003249	hsa-miR-584	hsa-miR-584-5p	miR-584	hsa-miR-584
MIMAT0003252	hsa-miR-586	hsa-miR-586	miR-586	hsa-miR-586
MIMAT0003253	hsa-miR-587	hsa-miR-587	miR-587	hsa-miR-587
MIMAT0003254	hsa-miR-548b-3p	hsa-miR-548b-3p	miR-548b-3p	hsa-miR-548b-3p
MIMAT0003255	hsa-miR-588	hsa-miR-588	miR-588/4701-5p	hsa-miR-588
MIMAT0003256	hsa-miR-589*	hsa-miR-589-3p	NA	NA
MIMAT0003257	hsa-miR-550*	hsa-miR-550a-3p	NA	NA
MIMAT0003258	hsa-miR-590-5p	hsa-miR-590-5p	miR-21/590-5p	hsa-miR-590-5p
MIMAT0003259	hsa-miR-591	hsa-miR-591	miR-591	hsa-miR-591
MIMAT0003260	hsa-miR-592	hsa-miR-592	miR-592/599.m	hsa-miR-592
MIMAT0003261	hsa-miR-593*	hsa-miR-593-5p	NA	NA
MIMAT0003263	hsa-miR-595	hsa-miR-595	miR-595	hsa-miR-595
MIMAT0003264	hsa-miR-596	hsa-miR-596	miR-596/2353	hsa-miR-596
MIMAT0003265	hsa-miR-597	hsa-miR-597	miR-597/1970	hsa-miR-597
MIMAT0003266	hsa-miR-598	hsa-miR-598	miR-598/598-3p	hsa-miR-598
MIMAT0003267	hsa-miR-599	hsa-miR-599	miR-592/599	hsa-miR-599
MIMAT0003268	hsa-miR-600	hsa-miR-600	miR-600	hsa-miR-600
MIMAT0003269	hsa-miR-601	hsa-miR-601	miR-601/5135	hsa-miR-601
MIMAT0003270	hsa-miR-602	hsa-miR-602	miR-602	hsa-miR-602
MIMAT0003271	hsa-miR-603	hsa-miR-603	miR-603/3571	hsa-miR-603
MIMAT0003272	hsa-miR-604	hsa-miR-604	miR-604	hsa-miR-604
MIMAT0003273	hsa-miR-605	hsa-miR-605	miR-605	hsa-miR-605
MIMAT0003275	hsa-miR-607	hsa-miR-607	miR-607	hsa-miR-607
MIMAT0003276	hsa-miR-608	hsa-miR-608	miR-608/1331/4651	hsa-miR-608
MIMAT0003277	hsa-miR-609	hsa-miR-609	miR-609	hsa-miR-609
MIMAT0003278	hsa-miR-610	hsa-miR-610	miR-610	hsa-miR-610
MIMAT0003279	hsa-miR-611	hsa-miR-611	miR-611/3131	hsa-miR-611
MIMAT0003280	hsa-miR-612	hsa-miR-612	miR-612/1285/3187-5p	hsa-miR-612
MIMAT0003282	hsa-miR-614	hsa-miR-614	miR-614	hsa-miR-614
MIMAT0003283	hsa-miR-615-3p	hsa-miR-615-3p	miR-615-3p	hsa-miR-615-3p
MIMAT0003284	hsa-miR-616*	hsa-miR-616-5p	NA	NA
MIMAT0003285	hsa-miR-548c-3p	hsa-miR-548c-3p	miR-548c-3p	hsa-miR-548c-3p
MIMAT0003286	hsa-miR-617	hsa-miR-617	miR-617/2340	hsa-miR-617
MIMAT0003288	hsa-miR-619	hsa-miR-619	miR-619	hsa-miR-619
MIMAT0003289	hsa-miR-620	hsa-miR-620	miR-620/1270	hsa-miR-620
MIMAT0003290	hsa-miR-621	hsa-miR-621	miR-621	hsa-miR-621
MIMAT0003291	hsa-miR-622	hsa-miR-622	miR-622	hsa-miR-622
MIMAT0003292	hsa-miR-623	hsa-miR-623	miR-623	hsa-miR-623
MIMAT0003293	hsa-miR-624*	hsa-miR-624-5p	NA	NA
MIMAT0003295	hsa-miR-626	hsa-miR-626	miR-626	hsa-miR-626
MIMAT0003296	hsa-miR-627	hsa-miR-627	miR-580/627	hsa-miR-627
MIMAT0003297	hsa-miR-628-3p	hsa-miR-628-3p	miR-628-3p	hsa-miR-628-3p
MIMAT0003298	hsa-miR-629*	hsa-miR-629-3p	NA	NA
MIMAT0003299	hsa-miR-630	hsa-miR-630	miR-630	hsa-miR-630
MIMAT0003300	hsa-miR-631	hsa-miR-631	miR-631/3661	hsa-miR-631
MIMAT0003301	hsa-miR-33b	hsa-miR-33b-5p	miR-33ab/33-5p	hsa-miR-33b
MIMAT0003302	hsa-miR-632	hsa-miR-632	miR-632/4288	hsa-miR-632
MIMAT0003304	hsa-miR-634	hsa-miR-634	miR-634	hsa-miR-634
MIMAT0003306	hsa-miR-636	hsa-miR-636	miR-636	hsa-miR-636
MIMAT0003307	hsa-miR-637	hsa-miR-637	miR-637	hsa-miR-637
MIMAT0003308	hsa-miR-638	hsa-miR-638	miR-638	hsa-miR-638
MIMAT0003309	hsa-miR-639	hsa-miR-639	miR-639	hsa-miR-639
MIMAT0003310	hsa-miR-640	hsa-miR-640	miR-640	hsa-miR-640
MIMAT0003311	hsa-miR-641	hsa-miR-641	miR-641/3617	hsa-miR-641
MIMAT0003312	hsa-miR-642	hsa-miR-642a-5p	miR-642a	hsa-miR-642a
MIMAT0003313	hsa-miR-643	hsa-miR-643	miR-643	hsa-miR-643
MIMAT0003315	hsa-miR-645	hsa-miR-645	miR-645	hsa-miR-645
MIMAT0003316	hsa-miR-646	hsa-miR-646	miR-646	hsa-miR-646
MIMAT0003317	hsa-miR-647	hsa-miR-647	miR-647	hsa-miR-647
MIMAT0003319	hsa-miR-649	hsa-miR-649	miR-649	hsa-miR-649
MIMAT0003320	hsa-miR-650	hsa-miR-650	miR-650/650abc/3612	hsa-miR-650
MIMAT0003321	hsa-miR-651	hsa-miR-651	miR-651	hsa-miR-651
MIMAT0003322	hsa-miR-652	hsa-miR-652-3p	miR-652	hsa-miR-652
MIMAT0003324	hsa-miR-661	hsa-miR-661	miR-661	hsa-miR-661
MIMAT0003325	hsa-miR-662	hsa-miR-662	miR-662	hsa-miR-662
MIMAT0003326	hsa-miR-663	hsa-miR-663a	miR-663/663a/1908	hsa-miR-663
MIMAT0003327	hsa-miR-449b	hsa-miR-449b-5p	miR-34ac/34bc-5p/449abc/449c-5p	hsa-miR-449b
MIMAT0003328	hsa-miR-653	hsa-miR-653	miR-653	hsa-miR-653
MIMAT0003329	hsa-miR-411	hsa-miR-411-5p	miR-411	hsa-miR-411
MIMAT0003330	hsa-miR-654-5p	hsa-miR-654-5p	miR-654-5p/541	hsa-miR-654-5p
MIMAT0003333	hsa-miR-549	hsa-miR-549	miR-549	hsa-miR-549
MIMAT0003336	hsa-miR-658	hsa-miR-658	miR-658	hsa-miR-658
MIMAT0003337	hsa-miR-659	hsa-miR-659-3p	miR-659	hsa-miR-659
MIMAT0003338	hsa-miR-660	hsa-miR-660-5p	miR-660	hsa-miR-660
MIMAT0003339	hsa-miR-421	hsa-miR-421	miR-421	hsa-miR-421
MIMAT0003340	hsa-miR-542-5p	hsa-miR-542-5p	miR-542-5p	hsa-miR-542-5p
MIMAT0003385	hsa-miR-363*	hsa-miR-363-5p	NA	NA
MIMAT0003386	hsa-miR-376a*	hsa-miR-376a-5p	NA	NA
MIMAT0003393	hsa-miR-425	hsa-miR-425-5p	miR-425/425-5p/489	hsa-miR-425
MIMAT0003879	hsa-miR-758	hsa-miR-758	miR-758	hsa-miR-758
MIMAT0003880	hsa-miR-671-5p	hsa-miR-671-5p	miR-671-5p	hsa-miR-671-5p
MIMAT0003881	hsa-miR-668	hsa-miR-668	miR-668	hsa-miR-668
MIMAT0003882	hsa-miR-767-5p	hsa-miR-767-5p	miR-767-5p	hsa-miR-767-5p
MIMAT0003883	hsa-miR-767-3p	hsa-miR-767-3p	miR-767-3p	hsa-miR-767-3p
MIMAT0003884	hsa-miR-454*	hsa-miR-454-5p	NA	NA
MIMAT0003885	hsa-miR-454	hsa-miR-454-3p	miR-130ac/301ab/301b/301b-3p/454/721/4295/3666	hsa-miR-454
MIMAT0003886	hsa-miR-769-5p	hsa-miR-769-5p	miR-769-5p	hsa-miR-769-5p
MIMAT0003887	hsa-miR-769-3p	hsa-miR-769-3p	miR-450b-3p/769-3p	hsa-miR-769-3p
MIMAT0003888	hsa-miR-766	hsa-miR-766-3p	miR-766	hsa-miR-766
MIMAT0003945	hsa-miR-765	hsa-miR-765	miR-765/3584-5p	hsa-miR-765
MIMAT0003948	hsa-miR-770-5p	hsa-miR-770-5p	miR-770-5p/4712-5p	hsa-miR-770-5p
MIMAT0004185	hsa-miR-802	hsa-miR-802	miR-802	hsa-miR-802
MIMAT0004284	hsa-miR-675b	hsa-miR-675-5p	miR-675-5p/4466	hsa-miR-675
MIMAT0004450	hsa-miR-297	hsa-miR-297	miR-297ac/297b-5p	hsa-miR-297
MIMAT0004481	hsa-let-7a*	hsa-let-7a-3p	NA	NA
MIMAT0004482	hsa-let-7b*	hsa-let-7b-3p	NA	NA
MIMAT0004483	hsa-let-7c*	NA	NA	NA
MIMAT0004484	hsa-let-7d*	hsa-let-7d-3p	NA	NA
MIMAT0004486	hsa-let-7f-1*	hsa-let-7f-1-3p	NA	NA
MIMAT0004487	hsa-let-7f-2*	hsa-let-7f-2-3p	NA	NA
MIMAT0004488	hsa-miR-15a*	hsa-miR-15a-3p	NA	NA
MIMAT0004491	hsa-miR-19b-1*	hsa-miR-19b-1-5p	NA	NA
MIMAT0004492	hsa-miR-19b-2*	hsa-miR-19b-2-5p	NA	NA
MIMAT0004493	hsa-miR-20a*	hsa-miR-20a-3p	NA	NA
MIMAT0004494	hsa-miR-21*	hsa-miR-21-3p	NA	NA
MIMAT0004495	hsa-miR-22*	hsa-miR-22-5p	NA	NA
MIMAT0004496	hsa-miR-23a*	hsa-miR-23a-5p	NA	NA
MIMAT0004497	hsa-miR-24-2*	hsa-miR-24-2-5p	NA	NA
MIMAT0004498	hsa-miR-25*	hsa-miR-25-5p	NA	NA
MIMAT0004499	hsa-miR-26a-1*	hsa-miR-26a-1-3p	NA	NA
MIMAT0004500	hsa-miR-26b*	hsa-miR-26b-3p	NA	NA
MIMAT0004502	hsa-miR-28-3p	hsa-miR-28-3p	miR-28-3p	hsa-miR-28-3p
MIMAT0004503	hsa-miR-29a*	hsa-miR-29a-5p	NA	NA
MIMAT0004504	hsa-miR-31*	hsa-miR-31-3p	NA	NA
MIMAT0004506	hsa-miR-33a*	hsa-miR-33a-3p	NA	NA
MIMAT0004507	hsa-miR-92a-1*	hsa-miR-92a-1-5p	NA	NA
MIMAT0004508	hsa-miR-92a-2*	hsa-miR-92a-2-5p	NA	NA
MIMAT0004509	hsa-miR-93*	hsa-miR-93-3p	NA	NA
MIMAT0004510	hsa-miR-96*	hsa-miR-96-3p	NA	NA
MIMAT0004511	hsa-miR-99a*	hsa-miR-99a-3p	NA	NA
MIMAT0004512	hsa-miR-100*	hsa-miR-100-3p	NA	NA
MIMAT0004513	hsa-miR-101*	hsa-miR-101-5p	NA	NA
MIMAT0004514	hsa-miR-29b-1*	hsa-miR-29b-1-5p	NA	NA
MIMAT0004515	hsa-miR-29b-2*	hsa-miR-29b-2-5p	NA	NA
MIMAT0004516	hsa-miR-105*	hsa-miR-105-3p	NA	NA
MIMAT0004517	hsa-miR-106a*	hsa-miR-106a-3p	NA	NA
MIMAT0004518	hsa-miR-16-2*	hsa-miR-16-2-3p	NA	NA
MIMAT0004543	hsa-miR-192*	hsa-miR-192-3p	NA	NA
MIMAT0004548	hsa-miR-129*	hsa-miR-129-1-3p	NA	NA
MIMAT0004549	hsa-miR-148a*	hsa-miR-148a-5p	NA	NA
MIMAT0004550	hsa-miR-30c-2*	hsa-miR-30c-2-3p	NA	NA
MIMAT0004551	hsa-miR-30d*	hsa-miR-30d-3p	NA	NA
MIMAT0004553	hsa-miR-7-1*	hsa-miR-7-1-3p	NA	NA
MIMAT0004554	hsa-miR-7-2*	hsa-miR-7-2-3p	NA	NA
MIMAT0004555	hsa-miR-10a*	hsa-miR-10a-3p	NA	NA
MIMAT0004556	hsa-miR-10b*	hsa-miR-10b-3p	NA	NA
MIMAT0004557	hsa-miR-34a*	hsa-miR-34a-3p	NA	NA
MIMAT0004558	hsa-miR-181a-2*	hsa-miR-181a-2-3p	NA	NA
MIMAT0004559	hsa-miR-181c*	hsa-miR-181c-3p	NA	NA
MIMAT0004560	hsa-miR-183*	hsa-miR-183-3p	NA	NA
MIMAT0004561	hsa-miR-187*	hsa-miR-187-5p	NA	NA
MIMAT0004564	hsa-miR-214*	hsa-miR-214-5p	NA	NA
MIMAT0004565	hsa-miR-218-1*	hsa-miR-218-1-3p	NA	NA
MIMAT0004567	hsa-miR-219-1-3p	hsa-miR-219-1-3p	miR-219-1-3p	hsa-miR-219-1-3p
MIMAT0004568	hsa-miR-221*	hsa-miR-221-5p	NA	NA
MIMAT0004569	hsa-miR-222*	hsa-miR-222-5p	NA	NA
MIMAT0004570	hsa-miR-223*	hsa-miR-223-5p	NA	NA
MIMAT0004571	hsa-miR-200b*	hsa-miR-200b-5p	NA	NA
MIMAT0004584	hsa-let-7g*	hsa-let-7g-3p	NA	NA
MIMAT0004585	hsa-let-7i*	hsa-let-7i-3p	NA	NA
MIMAT0004586	hsa-miR-15b*	hsa-miR-15b-3p	NA	NA
MIMAT0004587	hsa-miR-23b*	hsa-miR-23b-5p	NA	NA
MIMAT0004588	hsa-miR-27b*	hsa-miR-27b-5p	NA	NA
MIMAT0004589	hsa-miR-30b*	hsa-miR-30b-3p	NA	NA
MIMAT0004590	hsa-miR-122*	hsa-miR-122-3p	NA	NA
MIMAT0004591	hsa-miR-124*	hsa-miR-124-5p	NA	NA
MIMAT0004592	hsa-miR-125b-1*	hsa-miR-125b-1-3p	NA	NA
MIMAT0004593	hsa-miR-130a*	hsa-miR-130a-5p	NA	NA
MIMAT0004594	hsa-miR-132*	hsa-miR-132-5p	NA	NA
MIMAT0004595	hsa-miR-135a*	hsa-miR-135a-3p	NA	NA
MIMAT0004596	hsa-miR-138-2*	hsa-miR-138-2-3p	NA	NA
MIMAT0004597	hsa-miR-140-3p	hsa-miR-140-3p	miR-140-3p	hsa-miR-140-3p
MIMAT0004598	hsa-miR-141*	hsa-miR-141-5p	NA	NA
MIMAT0004599	hsa-miR-143*	hsa-miR-143-5p	NA	NA
MIMAT0004600	hsa-miR-144*	hsa-miR-144-5p	NA	NA
MIMAT0004601	hsa-miR-145*	hsa-miR-145-3p	NA	NA
MIMAT0004602	hsa-miR-125a-3p	hsa-miR-125a-3p	miR-125a-3p/1554	hsa-miR-125a-3p
MIMAT0004603	hsa-miR-125b-2*	hsa-miR-125b-2-3p	NA	NA
MIMAT0004604	hsa-miR-127-5p	hsa-miR-127-5p	miR-127-5p	hsa-miR-127-5p
MIMAT0004605	hsa-miR-129-3p	hsa-miR-129-2-3p	miR-129-3p/129ab-3p/129-1-3p/129-2-3p	hsa-miR-129-3p
MIMAT0004607	hsa-miR-138-1*	hsa-miR-138-1-3p	NA	NA
MIMAT0004608	hsa-miR-146a*	hsa-miR-146a-3p	NA	NA
MIMAT0004609	hsa-miR-149*	hsa-miR-149-3p	NA	NA
MIMAT0004611	hsa-miR-185*	hsa-miR-185-3p	NA	NA
MIMAT0004613	hsa-miR-188-3p	hsa-miR-188-3p	miR-188-3p	hsa-miR-188-3p
MIMAT0004614	hsa-miR-193a-5p	hsa-miR-193a-5p	miR-193a-5p	hsa-miR-193a-5p
MIMAT0004615	hsa-miR-195*	hsa-miR-195-3p	NA	NA
MIMAT0004657	hsa-miR-200c*	hsa-miR-200c-5p	NA	NA
MIMAT0004658	hsa-miR-155*	hsa-miR-155-3p	NA	NA
MIMAT0004671	hsa-miR-194*	hsa-miR-194-3p	NA	NA
MIMAT0004672	hsa-miR-106b*	hsa-miR-106b-3p	NA	NA
MIMAT0004673	hsa-miR-29c*	hsa-miR-29c-5p	NA	NA
MIMAT0004674	hsa-miR-30c-1*	hsa-miR-30c-1-3p	NA	NA
MIMAT0004675	hsa-miR-219-2-3p	hsa-miR-219-2-3p	miR-219-2-3p/219-3p	hsa-miR-219-2-3p
MIMAT0004676	hsa-miR-34b	hsa-miR-34b-3p	miR-34b	hsa-miR-34b
MIMAT0004677	hsa-miR-34c-3p	hsa-miR-34c-3p	miR-34bc-3p	hsa-miR-34c-3p
MIMAT0004678	hsa-miR-99b*	hsa-miR-99b-3p	NA	NA
MIMAT0004679	hsa-miR-296-3p	hsa-miR-296-3p	miR-296-3p	hsa-miR-296-3p
MIMAT0004680	hsa-miR-130b*	hsa-miR-130b-5p	NA	NA
MIMAT0004681	hsa-miR-26a-2*	hsa-miR-26a-2-3p	NA	NA
MIMAT0004682	hsa-miR-361-3p	hsa-miR-361-3p	miR-361-3p	hsa-miR-361-3p
MIMAT0004683	hsa-miR-362-3p	hsa-miR-362-3p	miR-329/329ab/362-3p	hsa-miR-362-3p
MIMAT0004685	hsa-miR-302d*	hsa-miR-302d-5p	NA	NA
MIMAT0004687	hsa-miR-371-5p	hsa-miR-371a-5p	miR-290-5p/292-5p/371-5p/293	hsa-miR-371-5p
MIMAT0004690	hsa-miR-379*	hsa-miR-379-3p	NA	NA
MIMAT0004692	hsa-miR-340	hsa-miR-340-5p	miR-340-5p	hsa-miR-340
MIMAT0004693	hsa-miR-330-5p	hsa-miR-330-5p	miR-326/330/330-5p	hsa-miR-330-5p
MIMAT0004694	hsa-miR-342-5p	hsa-miR-342-5p	miR-342-5p/4664-5p	hsa-miR-342-5p
MIMAT0004695	hsa-miR-337-5p	hsa-miR-337-5p	miR-337-5p	hsa-miR-337-5p
MIMAT0004696	hsa-miR-323-5p	hsa-miR-323a-5p	miR-323-5p/1421qns	hsa-miR-323-5p
MIMAT0004697	hsa-miR-151-5p	hsa-miR-151a-5p	miR-151-5p/151b	hsa-miR-151-5p
MIMAT0004698	hsa-miR-135b*	hsa-miR-135b-3p	NA	NA
MIMAT0004699	hsa-miR-148b*	hsa-miR-148b-5p	NA	NA
MIMAT0004700	hsa-miR-331-5p	hsa-miR-331-5p	miR-331-5p	hsa-miR-331-5p
MIMAT0004701	hsa-miR-338-5p	hsa-miR-338-5p	miR-338-5p	hsa-miR-338-5p
MIMAT0004702	hsa-miR-339-3p	hsa-miR-339-3p	miR-339-3p	hsa-miR-339-3p
MIMAT0004703	hsa-miR-335*	hsa-miR-335-3p	NA	NA
MIMAT0004748	hsa-miR-423-5p	hsa-miR-423-5p	miR-423a/423-5p/3184/3573-5p	hsa-miR-423-5p
MIMAT0004749	hsa-miR-424*	hsa-miR-424-3p	NA	NA
MIMAT0004751	hsa-miR-18b*	hsa-miR-18b-3p	NA	NA
MIMAT0004752	hsa-miR-20b*	hsa-miR-20b-3p	NA	NA
MIMAT0004757	hsa-miR-431*	hsa-miR-431-3p	NA	NA
MIMAT0004762	hsa-miR-486-3p	hsa-miR-486-3p	miR-486-3p	hsa-miR-486-3p
MIMAT0004763	hsa-miR-488	hsa-miR-488-3p	miR-488	hsa-miR-488
MIMAT0004764	hsa-miR-490-5p	hsa-miR-490-5p	miR-490-5p	hsa-miR-490-5p
MIMAT0004765	hsa-miR-491-3p	hsa-miR-491-3p	miR-491-3p	hsa-miR-491-3p
MIMAT0004766	hsa-miR-146b-3p	hsa-miR-146b-3p	miR-146b-3p	hsa-miR-146b-3p
MIMAT0004767	hsa-miR-193b*	hsa-miR-193b-5p	NA	NA
MIMAT0004770	hsa-miR-516a-5p	hsa-miR-516a-5p	miR-516a-5p	hsa-miR-516a-5p
MIMAT0004772	hsa-miR-499-3p	hsa-miR-499a-3p	miR-499-3p/499a-3p	hsa-miR-499-3p
MIMAT0004773	hsa-miR-500	hsa-miR-500a-5p	miR-500a	hsa-miR-500a
MIMAT0004774	hsa-miR-501-3p	hsa-miR-501-3p	miR-501-3p/502-3p/500/502a	hsa-miR-501-3p
MIMAT0004775	hsa-miR-502-3p	hsa-miR-502-3p	miR-501-3p/502-3p/500/502a	hsa-miR-502-3p
MIMAT0004776	hsa-miR-505*	hsa-miR-505-5p	NA	NA
MIMAT0004777	hsa-miR-513a-3p	hsa-miR-513a-3p	miR-513a-3p	hsa-miR-513a-3p
MIMAT0004778	hsa-miR-508-5p	hsa-miR-508-5p	miR-508-5p/509-5p	hsa-miR-508-5p
MIMAT0004780	hsa-miR-532-3p	hsa-miR-532-3p	miR-532-3p	hsa-miR-532-3p
MIMAT0004784	hsa-miR-455-3p	hsa-miR-455-3p	miR-455-3p	hsa-miR-455-3p
MIMAT0004792	hsa-miR-92b*	hsa-miR-92b-5p	NA	NA
MIMAT0004793	hsa-miR-556-3p	hsa-miR-556-3p	miR-556-3p	hsa-miR-556-3p
MIMAT0004794	hsa-miR-551b*	hsa-miR-551b-5p	NA	NA
MIMAT0004796	hsa-miR-576-3p	hsa-miR-576-3p	miR-576-3p	hsa-miR-576-3p
MIMAT0004797	hsa-miR-582-3p	hsa-miR-582-3p	miR-582-3p	hsa-miR-582-3p
MIMAT0004799	hsa-miR-589	hsa-miR-589-5p	miR-589	hsa-miR-589
MIMAT0004800	hsa-miR-550	hsa-miR-550a-5p	miR-550a	hsa-miR-550a
MIMAT0004802	hsa-miR-593	hsa-miR-593-3p	miR-593	hsa-miR-593
MIMAT0004803	hsa-miR-548a-5p	hsa-miR-548a-5p	miR-548abakhjiwy/548abcd-5p/559	hsa-miR-548a-5p
MIMAT0004804	hsa-miR-615-5p	hsa-miR-615-5p	miR-615-5p	hsa-miR-615-5p
MIMAT0004805	hsa-miR-616	hsa-miR-616-3p	miR-616	hsa-miR-616
MIMAT0004806	hsa-miR-548c-5p	hsa-miR-548c-5p	miR-548abakhjiwy/548abcd-5p/559	hsa-miR-548c-5p
MIMAT0004808	hsa-miR-625*	hsa-miR-625-3p	NA	NA
MIMAT0004809	hsa-miR-628-5p	hsa-miR-628-5p	miR-628-5p/628a	hsa-miR-628-5p
MIMAT0004810	hsa-miR-629	hsa-miR-629-5p	miR-629	hsa-miR-629
MIMAT0004811	hsa-miR-33b*	hsa-miR-33b-3p	NA	NA
MIMAT0004812	hsa-miR-548d-5p	hsa-miR-548d-5p	miR-548abakhjiwy/548abcd-5p/559	hsa-miR-548d-5p
MIMAT0004813	hsa-miR-411*	hsa-miR-411-3p	NA	NA
MIMAT0004814	hsa-miR-654-3p	hsa-miR-654-3p	miR-654-3p	hsa-miR-654-3p
MIMAT0004819	hsa-miR-671-3p	hsa-miR-671-3p	miR-671-3p	hsa-miR-671-3p
MIMAT0004901	hsa-miR-298	hsa-miR-298	miR-298	hsa-miR-298
MIMAT0004902	hsa-miR-891a	hsa-miR-891a	miR-891a	hsa-miR-891a
MIMAT0004903	hsa-miR-300	hsa-miR-300	miR-300/381/539-3p	hsa-miR-300
MIMAT0004907	hsa-miR-892a	hsa-miR-892a	miR-881/892a	hsa-miR-892a
MIMAT0004909	hsa-miR-450b-5p	hsa-miR-450b-5p	miR-450b-5p	hsa-miR-450b-5p
MIMAT0004910	hsa-miR-450b-3p	hsa-miR-450b-3p	miR-450b-3p/769-3p	hsa-miR-450b-3p
MIMAT0004912	hsa-miR-890	hsa-miR-890	miR-890	hsa-miR-890
MIMAT0004913	hsa-miR-891b	hsa-miR-891b	miR-891b	hsa-miR-891b
MIMAT0004916	hsa-miR-888	hsa-miR-888-5p	miR-888	hsa-miR-888
MIMAT0004917	hsa-miR-888*	hsa-miR-888-3p	NA	NA
MIMAT0004919	hsa-miR-541*	hsa-miR-541-5p	NA	NA
MIMAT0004920	hsa-miR-541	hsa-miR-541-3p	miR-654-5p/541	hsa-miR-541
MIMAT0004921	hsa-miR-889	hsa-miR-889	miR-889	hsa-miR-889
MIMAT0004922	hsa-miR-875-5p	hsa-miR-875-5p	miR-875-5p	hsa-miR-875-5p
MIMAT0004923	hsa-miR-875-3p	hsa-miR-875-3p	miR-875-3p	hsa-miR-875-3p
MIMAT0004924	hsa-miR-876-5p	hsa-miR-876-5p	miR-876-5p/3167	hsa-miR-876-5p
MIMAT0004925	hsa-miR-876-3p	hsa-miR-876-3p	miR-876-3p	hsa-miR-876-3p
MIMAT0004926	hsa-miR-708	hsa-miR-708-5p	miR-28-5p/708/1407/1653/3139	hsa-miR-708
MIMAT0004927	hsa-miR-708*	hsa-miR-708-3p	NA	NA
MIMAT0004928	hsa-miR-147b	hsa-miR-147b	miR-147/147b	hsa-miR-147b
MIMAT0004929	hsa-miR-190b	hsa-miR-190b	miR-190/190ab	hsa-miR-190b
MIMAT0004945	hsa-miR-744	hsa-miR-744-5p	miR-744/1716	hsa-miR-744
MIMAT0004946	hsa-miR-744*	hsa-miR-744-3p	NA	NA
MIMAT0004947	hsa-miR-885-5p	hsa-miR-885-5p	miR-885-5p	hsa-miR-885-5p
MIMAT0004948	hsa-miR-885-3p	hsa-miR-885-3p	miR-885-3p	hsa-miR-885-3p
MIMAT0004949	hsa-miR-877	hsa-miR-877-5p	miR-877	hsa-miR-877
MIMAT0004950	hsa-miR-877*	hsa-miR-877-3p	NA	NA
MIMAT0004951	hsa-miR-887	hsa-miR-887	miR-887	hsa-miR-887
MIMAT0004952	hsa-miR-665	hsa-miR-665	miR-665	hsa-miR-665
MIMAT0004953	hsa-miR-873	hsa-miR-873-5p	miR-873	hsa-miR-873
MIMAT0004954	hsa-miR-543	hsa-miR-543	miR-543	hsa-miR-543
MIMAT0004955	hsa-miR-374b	hsa-miR-374b-5p	miR-374ab	hsa-miR-374b
MIMAT0004956	hsa-miR-374b*	hsa-miR-374b-3p	NA	NA
MIMAT0004957	hsa-miR-760	hsa-miR-760	miR-760-3p/1842	hsa-miR-760
MIMAT0004958	hsa-miR-301b	hsa-miR-301b	miR-130ac/301ab/301b/301b-3p/454/721/4295/3666	hsa-miR-301b
MIMAT0004959	hsa-miR-216b	hsa-miR-216b	miR-216b/216b-5p	hsa-miR-216b
MIMAT0004960	hsa-miR-208b	hsa-miR-208b	miR-208ab/208ab-3p	hsa-miR-208b
MIMAT0004970	hsa-miR-920	hsa-miR-920	miR-920/4300	hsa-miR-920
MIMAT0004971	hsa-miR-921	hsa-miR-921	miR-921	hsa-miR-921
MIMAT0004972	hsa-miR-922	hsa-miR-922	miR-922/1704	hsa-miR-922
MIMAT0004974	hsa-miR-924	hsa-miR-924	miR-924	hsa-miR-924
MIMAT0004975	hsa-miR-509-3-5p	hsa-miR-509-3-5p	miR-509-5p/509-3-5p/4418	hsa-miR-509-3-5p
MIMAT0004976	hsa-miR-933	hsa-miR-933	miR-933	hsa-miR-933
MIMAT0004977	hsa-miR-934	hsa-miR-934	miR-934	hsa-miR-934
MIMAT0004979	hsa-miR-936	hsa-miR-936	miR-936	hsa-miR-936
MIMAT0004980	hsa-miR-937	hsa-miR-937	miR-937/2903	hsa-miR-937
MIMAT0004981	hsa-miR-938	hsa-miR-938	miR-938	hsa-miR-938
MIMAT0004983	hsa-miR-940	hsa-miR-940	miR-940	hsa-miR-940
MIMAT0004984	hsa-miR-941	hsa-miR-941	miR-941	hsa-miR-941
MIMAT0004985	hsa-miR-942	hsa-miR-942	miR-942	hsa-miR-942
MIMAT0004986	hsa-miR-943	hsa-miR-943	miR-943/2380	hsa-miR-943
MIMAT0005450	hsa-miR-518e*	hsa-miR-518e-5p	NA	NA
MIMAT0005456	hsa-miR-518d-5p	hsa-miR-518d-5p	miR-518d-5p/519bc-5p520c-5p/523b/526a	hsa-miR-518d-5p
MIMAT0005457	hsa-miR-518a-5p	hsa-miR-518a-5p	miR-518a-5p/527	hsa-miR-518a-5p
MIMAT0005459	hsa-miR-1224-3p	hsa-miR-1224-3p	miR-1224-3p	hsa-miR-1224-3p
MIMAT0005580	hsa-miR-1227	hsa-miR-1227	miR-1227	hsa-miR-1227
MIMAT0005591	hsa-miR-1236	hsa-miR-1236	miR-1236	hsa-miR-1236
MIMAT0005592	hsa-miR-1237	hsa-miR-1237	miR-1237/3557-5p	hsa-miR-1237
MIMAT0005593	hsa-miR-1238	hsa-miR-1238	miR-1238	hsa-miR-1238
MIMAT0005789	hsa-miR-513c	hsa-miR-513c-5p	miR-513c/514b-5p	hsa-miR-513c
MIMAT0005791	hsa-miR-1264	hsa-miR-1264	miR-1264	hsa-miR-1264
MIMAT0005792	hsa-miR-320b	hsa-miR-320b	miR-320abcd/4429	hsa-miR-320b
MIMAT0005794	hsa-miR-1296	hsa-miR-1296	miR-1296	hsa-miR-1296
MIMAT0005796	hsa-miR-1271	hsa-miR-1271-5p	miR-96/507/1271	hsa-miR-1271
MIMAT0005798	hsa-miR-1185	hsa-miR-1185-5p	miR-1185/3679-5p	hsa-miR-1185
MIMAT0005823	hsa-miR-1178	hsa-miR-1178	miR-1178	hsa-miR-1178
MIMAT0005824	hsa-miR-1179	hsa-miR-1179	miR-1179	hsa-miR-1179
MIMAT0005826	hsa-miR-1181	hsa-miR-1181	miR-1181	hsa-miR-1181
MIMAT0005827	hsa-miR-1182	hsa-miR-1182	miR-1182	hsa-miR-1182
MIMAT0005828	hsa-miR-1183	hsa-miR-1183	miR-1183	hsa-miR-1183
MIMAT0005829	hsa-miR-1184	hsa-miR-1184	miR-1184	hsa-miR-1184
MIMAT0005863	hsa-miR-1200	hsa-miR-1200	miR-1200	hsa-miR-1200
MIMAT0005866	hsa-miR-1203	hsa-miR-1203	miR-1203	hsa-miR-1203
MIMAT0005867	hsa-miR-663b	hsa-miR-663b	miR-663b	hsa-miR-663b
MIMAT0005868	hsa-miR-1204	hsa-miR-1204	miR-1204	hsa-miR-1204
MIMAT0005869	hsa-miR-1205	hsa-miR-1205	miR-1205	hsa-miR-1205
MIMAT0005870	hsa-miR-1206	hsa-miR-1206	miR-1206	hsa-miR-1206
MIMAT0005871	hsa-miR-1207-5p	hsa-miR-1207-5p	miR-1207-5p/4763-3p	hsa-miR-1207-5p
MIMAT0005873	hsa-miR-1208	hsa-miR-1208	miR-1208	hsa-miR-1208
MIMAT0005875	hsa-miR-548j	hsa-miR-548j	miR-548abakhjiwy/548abcd-5p/559	hsa-miR-548j
MIMAT0005882	hsa-miR-548k	hsa-miR-548k	miR-548k	hsa-miR-548k
MIMAT0005889	hsa-miR-548l	hsa-miR-548l	miR-548l	hsa-miR-548l
MIMAT0005894	hsa-miR-1243	hsa-miR-1243	miR-1243	hsa-miR-1243
MIMAT0005896	hsa-miR-1244	hsa-miR-1244	miR-1244	hsa-miR-1244
MIMAT0005897	hsa-miR-1245	hsa-miR-1245a	miR-1245	hsa-miR-1245
MIMAT0005899	hsa-miR-1247	hsa-miR-1247-5p	miR-1247	hsa-miR-1247
MIMAT0005900	hsa-miR-1248	hsa-miR-1248	miR-1248	hsa-miR-1248
MIMAT0005901	hsa-miR-1249	hsa-miR-1249	miR-1249	hsa-miR-1249
MIMAT0005904	hsa-miR-1253	hsa-miR-1253	miR-1253	hsa-miR-1253
MIMAT0005905	hsa-miR-1254	hsa-miR-1254	miR-1254/3116	hsa-miR-1254
MIMAT0005907	hsa-miR-1256	hsa-miR-1256	miR-1256	hsa-miR-1256
MIMAT0005909	hsa-miR-1258	hsa-miR-1258	miR-1258	hsa-miR-1258
MIMAT0005911	hsa-miR-1260	hsa-miR-1260a	miR-1260/1260b/1391	hsa-miR-1260
MIMAT0005915	hsa-miR-1263	hsa-miR-1263	miR-1263	hsa-miR-1263
MIMAT0005917	hsa-miR-548m	hsa-miR-548m	miR-548m	hsa-miR-548m
MIMAT0005918	hsa-miR-1265	hsa-miR-1265	miR-1265	hsa-miR-1265
MIMAT0005919	hsa-miR-548o	hsa-miR-548o-3p	miR-1323/548o	hsa-miR-548o
MIMAT0005920	hsa-miR-1266	hsa-miR-1266	miR-1266/4518	hsa-miR-1266
MIMAT0005921	hsa-miR-1267	hsa-miR-1267	miR-582-3p/1267/1396	hsa-miR-1267
MIMAT0005923	hsa-miR-1269	hsa-miR-1269a	miR-1269/1269b	hsa-miR-1269
MIMAT0005924	hsa-miR-1270	hsa-miR-1270	miR-620/1270	hsa-miR-1270
MIMAT0005925	hsa-miR-1272	hsa-miR-1272	miR-1272	hsa-miR-1272
MIMAT0005928	hsa-miR-548h	hsa-miR-548h-5p	miR-548abakhjiwy/548abcd-5p/559	hsa-miR-548h
MIMAT0005931	hsa-miR-302e	hsa-miR-302e	miR-93/93a/105/106a/291a-3p/294/295/302abcde/372/373/428/519a/520be/520acd-3p/1378/1420ac	hsa-miR-302e
MIMAT0005935	hsa-miR-548i	hsa-miR-548i	miR-548abakhjiwy/548abcd-5p/559	hsa-miR-548i
MIMAT0005944	hsa-miR-1252	hsa-miR-1252	miR-1252	hsa-miR-1252
MIMAT0005945	hsa-miR-1255b	hsa-miR-1255b-5p	miR-1255ab	hsa-miR-1255b
MIMAT0005949	hsa-miR-664	hsa-miR-664-3p	miR-664/664b	hsa-miR-664
MIMAT0005954	hsa-miR-720	hsa-miR-720	miR-720	hsa-miR-720
MIMAT0006778	hsa-miR-516a-3p	hsa-miR-516a-3p	miR-516a-3p/1375	hsa-miR-516a-3p
MIMAT0006789	hsa-miR-1468	hsa-miR-1468	miR-1468	hsa-miR-1468
MIMAT0006790	hsa-miR-675*	hsa-miR-675-3p	NA	NA
MIMAT0007349	hsa-miR-1471	hsa-miR-1471	miR-1471	hsa-miR-1471
MIMAT0007399	hsa-miR-1537	hsa-miR-1537	miR-1537	hsa-miR-1537
MIMAT0007400	hsa-miR-1538	hsa-miR-1538	miR-1538/4745-3p	hsa-miR-1538
MIMAT0007401	hsa-miR-1539	hsa-miR-1539	miR-1539	hsa-miR-1539
MIMAT0007402	hsa-miR-103-as	hsa-miR-103b	miR-103b	hsa-miR-103b
MIMAT0007881	hsa-miR-1908	hsa-miR-1908	miR-663/663a/1908	hsa-miR-1908
MIMAT0007883	hsa-miR-1909	hsa-miR-1909-3p	miR-1909	hsa-miR-1909
MIMAT0007885	hsa-miR-1911	hsa-miR-1911-5p	miR-1911	hsa-miR-1911
MIMAT0007886	hsa-miR-1911*	hsa-miR-1911-3p	NA	NA
MIMAT0007887	hsa-miR-1912	hsa-miR-1912	miR-1912	hsa-miR-1912
MIMAT0007888	hsa-miR-1913	hsa-miR-1913	miR-324-3p/1913	hsa-miR-1913
MIMAT0007889	hsa-miR-1914	hsa-miR-1914-5p	miR-1914	hsa-miR-1914
MIMAT0007890	hsa-miR-1914*	hsa-miR-1914-3p	NA	NA
MIMAT0009196	hsa-miR-103-2*	hsa-miR-103a-2-5p	NA	NA
MIMAT0009198	hsa-miR-224*	hsa-miR-224-3p	NA	NA
MIMAT0009199	hsa-miR-365*	hsa-miR-365a-5p	NA	NA
MIMAT0009201	hsa-miR-196b*	hsa-miR-196b-3p	NA	NA
MIMAT0009203	hsa-miR-449b*	hsa-miR-449b-3p	NA	NA
MIMAT0009206	hsa-miR-2113	hsa-miR-2113	miR-2113	hsa-miR-2113
MIMAT0009447	hsa-miR-1972	hsa-miR-1972	miR-1972	hsa-miR-1972
MIMAT0009978	hsa-miR-2053	hsa-miR-2053	miR-2053	hsa-miR-2053
MIMAT0010133	hsa-miR-2110	hsa-miR-2110	miR-1404/2110	hsa-miR-2110
MIMAT0010195	hsa-let-7a-2*	hsa-let-7a-2-3p	NA	NA
